# Supplementary material
Source: PubMed Central journal article supplement (PMC2998632)
Supplement: mmc1.pdf [file mmc1.pdf]

## Supplementary Information for:

# Distinguishable Populations Report on Interactions of Single DNA Molecules with Solid-State Nanopores

Michiel van den Hout, Vincent Krudde, Xander J.A. Janssen, and Nynke H. Dekker<sup>§</sup>

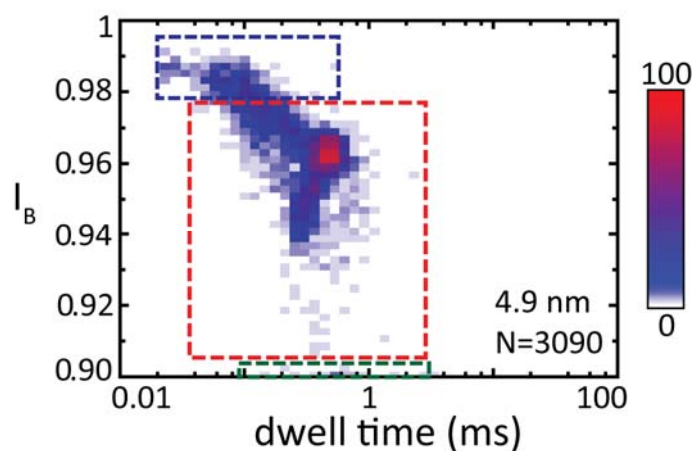

**Figure S1.** 2D-Histogram of  $I_B$  versus dwell time of the same nanopore as was used in Figure 3f. The dotted squares indicate the different event populations (**O**-events: blue, **H**-events: red, **L**-events: green). A longer DNA (48 kbp) and a zoomed-in vertical scale were employed, demonstrating that **O**- and **H**-events can be distinguished even in relatively large nanopores, such as this 4.9 nm diameter pore.

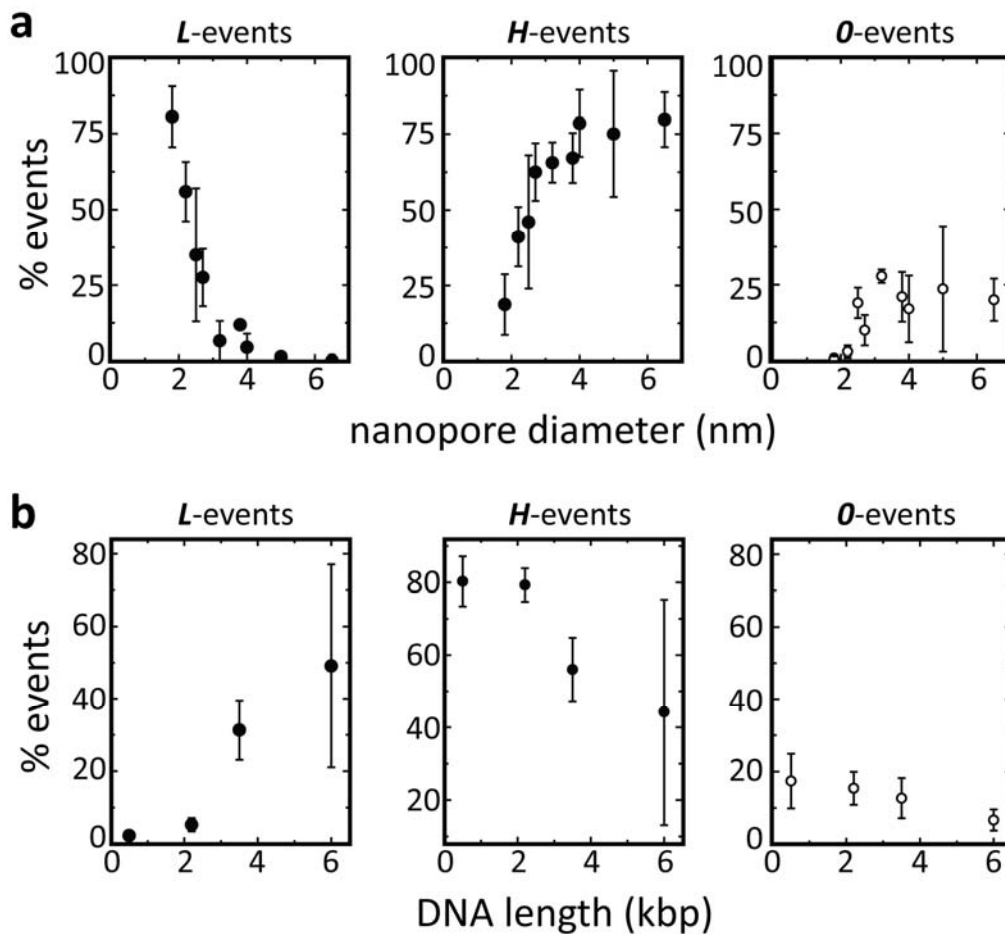

**Figure S2.** Plots of the percentages of *L*-, *H*-, and *O*-events accompanying the graphs shown in Figure 4. **a.** Percentages of *L*-, *H*-, and *O*-events for different nanopore diameters ranging from 1.8 nm to 6.5 nm. **b.** Percentages of *L*-, *H*-, and *O*-events for different DNA lengths ranging from 0.5 kbp to 6.0 kbp.

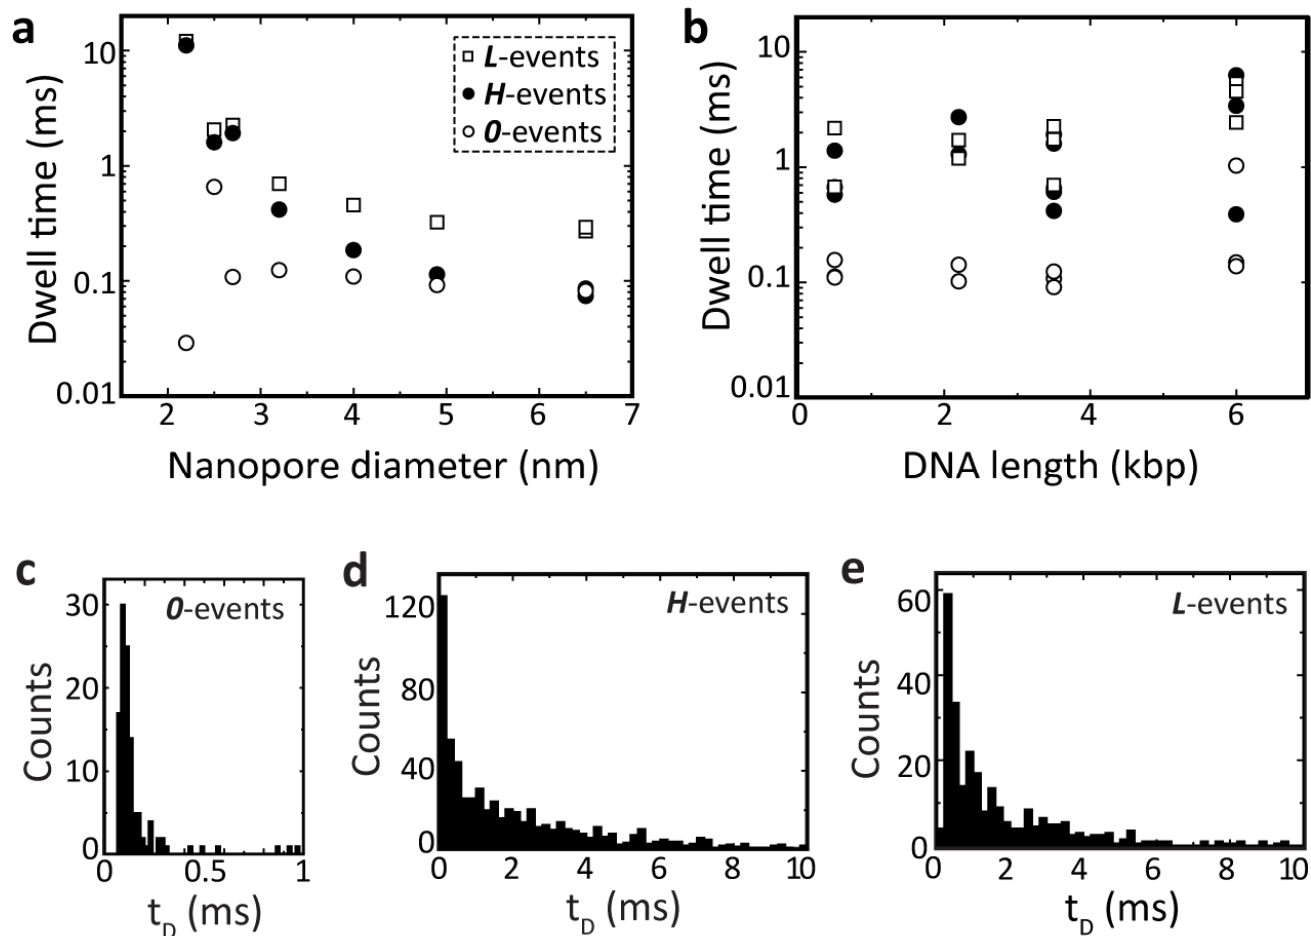

**Figure S3.** Analysis of the dwell time ( $t_D$ ) distributions for the different event types (**O**-events: open circles; **H**-events: closed circles; **L**-events: open squares). **a.** Average dwell time versus nanopore diameter for 3.5 kbp DNA. The average dwell time is observed to decrease with increased nanopore size for both the **H**- and **L**-events. Typically, however, the **L**-events are associated with the longest dwell times. **b.** Average dwell time versus DNA length in nanopores of 2.5–3 nm in diameter. The average dwell time of both **H**- and **L**-events increases slightly with increased DNA length. **c – e.** Dwell time distribution of **O**-, **H**- and **L**-events in a 2.7 nm pore. Note the different timescale for the **O**-events. Multilevel events are included in the **H**- and **L**-events as described in the Materials and Methods. Average dwell times were calculated by taking the average of the individual event dwell times (for the separate populations).

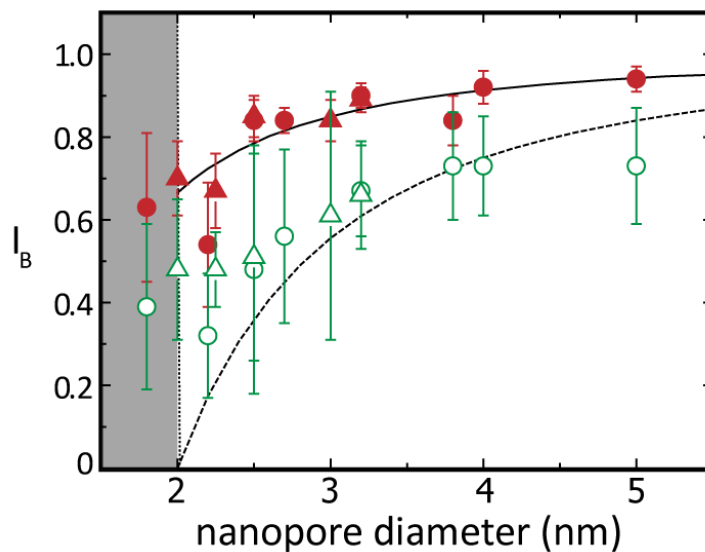

**Figure S4.** Average  $I_B$  versus nanopore diameter for 500 bp DNA (triangles) and 3.5 kbp DNA (circles). Closed (red) symbols represent average  $I_B$  values for the *H*-events, open (green) symbols correspond to average  $I_B$  values for the *L*-events. The  $I_B$  values are calculated by averaging the  $I_B$  values of the individual events (for both populations) and the errors reflect the standard deviation thereof. The dotted line corresponds to the value of  $I_B$  predicted under the assumptions that both the DNA and nanopore are perfect, impermeable, uncharged cylinders ( $d_{\text{DNA}} = 2.0$  nm), and that the current blockade is fully determined by volume exclusion. The solid line corresponds to the  $I_B$  predicted under the assumptions that the pore is hourglass-shaped with a surface charge of  $-0.015$  C/m<sup>2</sup>, and the DNA is a permeable, charged cylinder with a linear charge density of  $-0.96$  nC/m attracting counterions, of which 71% are assumed to be immobile [1]. The conductance blockade is described by formula (2) from Smeets et al [1]. The grey region denotes the region where the nanopore diameter is smaller than 2 nm, the diameter of the DNA double helix.

## Supplementary References

[1] Smeets. et al. 2006. Salt dependence of ion transport and DNA translocation through solid-state nanopores. *Nano Letters*. 6:89-96.
